# Supplementary material
Source: publisher site journal article supplement (https://www.dovepress.com/article/326132)
Supplement: Supplementary file 1 [file get_supplementary_file.php]

# Supplementary File. Main R functions of the Queralt DxS tool and Queralt System user's guide.

Performance of Three Measures of Comorbidity in Predicting Critical COVID-19: A Retrospective Analysis of 4,607 Hospitalized Patients

David Monterde, Gerard Carot-Sans, Miguel Cainzos-Achirica, Sònia Abilleira, Marc Coca, Emili Vela, Montse Clèries, Damià Valero, Josep Comin-Colet, Luis Garcia-Eroles, Pol Perez-Sust, Miquel Arrufat, Yolanda Lejardi, and Jordi Piera

## Contents

|                                          |        |
|------------------------------------------|--------|
| Main R functions of the Queralt DxS tool | Page 2 |
| Queralt System user's guide              | Page 4 |

```

Queralt.System.Dx = function(Data.Dx, id = "ID", dx = "ICD", type = "Type", poa = "POA") {

  if (!require("dplyr")) install.packages('package')
  if (!require("tidyr")) install.packages('package')
  library(dplyr)
  library(tidyr)

  Data = Data.Dx[,c(id,dx,type,poa)]
  names(Data) = c("ID", "Dx", "Type", "POA")
  Data$ID = as.character(Data$ID)
  PD = Data[Data$Type=="P",c("ID", "Dx")]
  PD = unique(PD)
  names(PD) = c("ID", "PD")

  Data =

  suppressMessages(

  Data%>%
    left_join(Table_Dx_QI, by = c("Dx" = "ICD"))%>%
    select(ID, ACS, Type, POA, W_global, W_risk, W_resources, W_severity)%>%
    unique()%>%
    mutate(ACS3 = substr(ACS, 1, 3))%>%
    mutate(W_global = coalesce(W_global, 0),
           W_risk = coalesce(W_risk, 0),
           W_resources = coalesce(W_resources, 0),
           W_severity = coalesce(W_severity, 0))%>%
    mutate(B = ifelse(Type == "P",
                      "IQDP",
                      ifelse(Type == "S" & POA == 1,
                              "IQDA",
                              "IQDC")))%>%
    filter(!is.na(ID) & !is.na(B) & !is.na(ACS3))%>%
    group_by(ID, B, ACS3)%>%
    summarise(W_global = max(W_global),
              W_risk = max(W_risk),
              W_resources = max(W_resources),
              W_severity = max(W_severity))%>%
    ungroup()%>%
    group_by(ID, B)%>%
    summarise(W_global = sum(W_global),
              W_risk = sum(W_risk),
              W_resources = sum(W_resources),
              W_severity = sum(W_severity))%>%
    ungroup()%>%
    pivot_longer(3:6, names_to = "W", values_to = "V")%>%
    mutate(Label = paste0(B, "_", W))%>%
    select(ID, Label, V)%>%
    pivot_wider(names_from = Label, values_from = V)%>%
    replace(., is.na(.), 0)%>%
    mutate(IQD_global = IQDA_W_global + IQDC_W_global + IQDP_W_global,
           IQD_risk = IQDA_W_risk + IQDC_W_risk + IQDP_W_risk,
           IQD_resources = IQDA_W_resources + IQDC_W_resources + IQDP_W_resources,
           IQD_severity = IQDA_W_severity + IQDC_W_severity + IQDP_W_severity)%>%
    arrange(ID)%>%
    left_join(PD, by = "ID")%>%
    left_join(Table_AD_2020, by = c("PD" = "ICD"))%>%
    mutate(CxD_Global = 1,
           CxD_Risk = 1,
           CxD_Resources = 1,
           CxD_Severity = 1)%>%
    arrange(ID))

  Data$CxD_Global = ifelse(Data$pt2_Global != 0 & Data$IQD_global >= Data$pt2_Global,
                           2,
                           Data$CxD_Global)
  Data$CxD_Global = ifelse(Data$pt3_Global != 0 & Data$IQD_global >= Data$pt3_Global,

```

```

        3,
        Data$CxD_Global)
Data$CxD_Global = ifelse(Data$pt4_Global != 0 & Data$IQD_global >= Data$pt4_Global,
        4,
        Data$CxD_Global)
Data$CxD_Global = ifelse(Data$pt5_Global != 0 & Data$IQD_global >= Data$pt5_Global,
        5,
        Data$CxD_Global)

Data$CxD_Risk = ifelse(Data$pt2_Risk != 0 & Data$IQD_risk >= Data$pt2_Risk,
        2,
        Data$CxD_Risk)
Data$CxD_Risk = ifelse(Data$pt3_Risk != 0 & Data$IQD_risk >= Data$pt3_Risk,
        3,
        Data$CxD_Risk)
Data$CxD_Risk = ifelse(Data$pt4_Risk != 0 & Data$IQD_risk >= Data$pt4_Risk,
        4,
        Data$CxD_Risk)
Data$CxD_Risk = ifelse(Data$pt5_Risk != 0 & Data$IQD_risk >= Data$pt5_Risk,
        5,
        Data$CxD_Risk)

Data$CxD_Resources = ifelse(Data$pt2_Resources != 0 & Data$IQD_resources >= Data$pt2_Resources,
        2,
        Data$CxD_Risk)
Data$CxD_Resources = ifelse(Data$pt3_Resources != 0 & Data$IQD_resources >= Data$pt3_Resources,
        3,
        Data$CxD_Risk)
Data$CxD_Resources = ifelse(Data$pt4_Resources != 0 & Data$IQD_resources >= Data$pt4_Resources,
        4,
        Data$CxD_Risk)
Data$CxD_Resources = ifelse(Data$pt5_Resources != 0 & Data$IQD_resources >= Data$pt5_Resources,
        5,
        Data$CxD_Risk)

Data$CxD_Severity = ifelse(Data$pt2_Severity != 0 & Data$IQD_severity >= Data$pt2_Severity,
        2,
        Data$CxD_Severity)
Data$CxD_Severity = ifelse(Data$pt3_Severity != 0 & Data$IQD_severity >= Data$pt3_Severity,
        3,
        Data$CxD_Severity)
Data$CxD_Severity = ifelse(Data$pt4_Severity != 0 & Data$IQD_severity >= Data$pt4_Severity,
        4,
        Data$CxD_Severity)
Data$CxD_Severity = ifelse(Data$pt5_Severity != 0 & Data$IQD_severity >= Data$pt5_Severity,
        5,
        Data$CxD_Severity)

Data = Data%>%
  select(ID,
         AD,
         ADdesc,
         ADM,
         ADMdesc,
         ##Queralt Groups
         CxD_Global,
         CxD_Risk,
         CxD_Resources,
         CxD_Severity,
         ##Queralt Index sum up!
         IQD_global,
         IQD_risk,
         IQD_resources,
         IQD_severity,
         ##Queralt Index Weight's for principal diagnoses
         IQDP_W_global,
         IQDP_W_risk,
         IQDP_W_resources,

```

```
IQDP_W_severity,  
##Queralt Index Weight's for secondary diagnosis  
IQDA_W_global,  
IQDA_W_risk,  
IQDA_W_resources,  
IQDA_W_severity,  
##Queralt Index Weight's for complications, aka not present on admission  
IQDC_W_global,  
IQDC_W_risk,  
IQDC_W_resources,  
IQDC_W_severity)
```

```
return(Data)
```

```
}
```

---

# **Queralt System:**

**A tool for hospital discharges risk  
stratification in R**

---

**User's Guide**

## Table of contents

|     |                                                                                    |   |
|-----|------------------------------------------------------------------------------------|---|
| 1   | First things first: what is Queralt System and what kind of data is expected?..... | 3 |
| 1.1 | Queralt System: a brief introduction.....                                          | 3 |
| 1.2 | The data: inputs .....                                                             | 4 |
| 1.3 | From now on.....                                                                   | 4 |
| 2   | Queralt System: diagnoses, procedures and outcomes .....                           | 5 |
| 2.1 | Queralt.System.Dx() .....                                                          | 5 |

# 1 First things first: what is Queralt System and what kind of data is expected?

## 1.1 Queralt System: a brief introduction

Stratification tools are widely used in healthcare data world. Queralt System aims to **capture and quantify the case-mix behind hospital discharges**.

Queralt System is similar to Charlson or Elixhauser indices or Diagnosis Related Groups (DRGs): the main goal is to assign a —risk- category to a patient, based on its personal health history and the hospitalization process.

While Charlson or Elixhauser indices focuses on comorbidities and DRGs stresses on the economic dimension, Queralt System integrates both worlds and can produce **different results according to the perspective of interest**: risk, resource consumption, severity and a global score.

Also, Queralt System **can handle diagnoses and procedures**, depending on the focus of the exercise: risk adjustment or resource consumption. For the purpose of this paper, **we just provide the functions and data for diagnoses**.

The main output generated are: **groups and indices**. Groups consists of an ordinal value ranged from 1 to 5, from lowest to highest risk. **Queralt Groups (CxD)** are computed based on diagnoses groups (AD) and, thus, their aim is to stratify the risk within AD.

**Indices** are calculated as the sum of weights of subindices associated to registered ICD-10 codes, differentiating their **position and context**: principal (P), secondary (S) or present on admission (POA).

As can be seen in figure 1, subindices are also provided by the function `Queralt.System.Dx()`. The paper submitted uses the **IQDA\_risk**, that considers POA codes and focuses on the risk of death.

The **weights** are the key component of Queralt System and are based on the data (and, hence, the characteristics) of Catalan Healthcare System users.

The algorithm considers three basic dimensions of every hospital admission: **principal diagnosis** (leading cause of the hospitalization), **secondary diagnosis** present on admission and identified thereafter and possible **hospital-associated complications**.

All in all, Queralt System considers the main elements of a hospital discharge that can be found in any administrative database, similar to DRGs, with the addition that is **open and freely distributed in R** (table 1).

**Table 1. Inputs considered by stratification algorithms**

| Inputs        | Charlson | Elixhauser | DRGs | Queralt |
|---------------|----------|------------|------|---------|
| Comorbidity   | x        | x          | x    | x       |
| Complications |          |            | x    | x       |
| Main cause    |          |            | x    | x       |
| Diagnoses     |          |            | x    | x       |
| Procedures    |          |            | x    | x       |
| Outputs       |          |            |      |         |
| Categorical   |          |            | x    | x       |
| Numerical     | x        | x          |      | x       |

## 1.2 The data: inputs

Queralt System for diagnoses requires a **dataframe structured in long format** with the following variables:

**Table 2. Queralt System's functions and arguments**

| Queralt.System.Dx(Data.Dx, id = "ID", dx = "ICD", type = "Type", poa = "POA") |                     |                                                                                  |
|-------------------------------------------------------------------------------|---------------------|----------------------------------------------------------------------------------|
| Variable                                                                      | Function's argument | Description                                                                      |
| Data.Dx                                                                       | Data.Dx             | The input dataframe                                                              |
| ID                                                                            | id =                | Individual Id of the patient or hospital discharge                               |
| Diagnoses                                                                     | dx =                | Diagnosis codes in ICD-10                                                        |
| Type                                                                          | type =              | Principal or secondary classification for the record: P or S values are expected |
| POA                                                                           | poa =               | Present on Admission: 0 or 1                                                     |

It is usual that, sometimes, this kind of data is structured in wide format, that is to say, different diagnoses codes are organized through columns. When this is the case, it is possible to reshape the table via `tidyr::pivot_longer()` function.

## 1.3 From now on

From now on it is going to be explained the main steps behind the algorithm through practical examples using the provided functions and, finally, before proceeding further, it must be made quite clear that Queralt System is for **research purposes only**.



## 2 Queralt System: diagnoses, procedures and outcomes

### 2.1 Queralt.System.Dx()

As stated above, the input data must be a dataframe composed by the following columns: an Id, diagnoses in ICD-10 and without points, the type of the diagnosis (P -for principal- or S -for secondary-) and 0 or 1 if present on admission. An example data set can be found in the workspace:

```
head(Data.Dx)
  ID   ICD   Type POA
1 0872 04292   P   1
2 0872 0669   S   1
3 0872 099214  S   1
4 0872 E6609   S   1
5 0872 Z6830   S   0
6 0872 09081   S   0
:   :       :   :   :
:   :       :   :   :
```

The function for the diagnoses is `Queralt.System.Dx()` and takes the following arguments (based on the example data):

```
Queralt.System.Dx(
  Data.Dx = Data.Dx,
  id = "ID",
  dx = "ICD",
  type = "Type",
  poa = "POA"
)
```

The output consists in a new dataframe of unique identifications (ID) and joined with the main components of Queralt System; an example is shown in figure 1.

**Figure 1. Queralt System for diagnoses: outcomes**

| Result                             | Columns            | Unique Id                                                                                                                                                                                                   |
|------------------------------------|--------------------|-------------------------------------------------------------------------------------------------------------------------------------------------------------------------------------------------------------|
| 0001                               | ID                 | Clinical Classifications Software Refined (CCSR) for principal diagnosis and ICD-10 chapter.                                                                                                                |
| CIR019                             | AD                 | <p><b>Queralt Groups:</b> an ordinal value ranged from 1 to 5, from lowest to highest risk.</p> <p><b>Queralt Indices:</b> sum of the three main weights IQDP, IQDA, IQDC</p>                               |
| Heart failure                      | ADdesc             |                                                                                                                                                                                                             |
| CIR                                | ADM                |                                                                                                                                                                                                             |
| Diseases of the circulatory system | ADMdesc            |                                                                                                                                                                                                             |
| 4                                  | CxD_Global         |                                                                                                                                                                                                             |
| 5                                  | CxD_Risk           | <p>Sum of diagnoses' weights:</p> <p>IQDP: Weights for Principal Diagnosis</p> <p>IQDA: Weights for diagnoses present on admission</p> <p>IQDC: Weights for diagnoses identified during hospitalization</p> |
| 5                                  | CxD_Resources      |                                                                                                                                                                                                             |
| 1                                  | CxD_Severity       |                                                                                                                                                                                                             |
| 45                                 | IQD_global         |                                                                                                                                                                                                             |
| 78                                 | IQD_risk           |                                                                                                                                                                                                             |
| 20                                 | IQD_resources      |                                                                                                                                                                                                             |
| 19                                 | IQD_seriousness    |                                                                                                                                                                                                             |
| 0                                  | IQDP_W_global      |                                                                                                                                                                                                             |
| 0                                  | IQDP_W_risk        |                                                                                                                                                                                                             |
| 0                                  | IQDP_W_resources   |                                                                                                                                                                                                             |
| 0                                  | IQDP_W_seriousness |                                                                                                                                                                                                             |
| 34                                 | IQDA_W_global      |                                                                                                                                                                                                             |
| 66                                 | IQDA_W_risk*       |                                                                                                                                                                                                             |
| 14                                 | IQDA_W_resources   |                                                                                                                                                                                                             |
| 11                                 | IQDA_W_seriousness |                                                                                                                                                                                                             |
| 11                                 | IQDC_W_global      |                                                                                                                                                                                                             |
| 12                                 | IQDC_W_risk        |                                                                                                                                                                                                             |
| 6                                  | IQDC_W_resources   |                                                                                                                                                                                                             |
| 8                                  | IQDC_W_seriousness |                                                                                                                                                                                                             |

\*IQDA\_W\_risk is the input considered in the submitted paper
